# Supplementary material for: Glucocorticoids Induce Stress Oncoproteins Associated with Therapy-Resistance in African American and European American Prostate Cancer Cells
Source: PubMed Central journal article supplement (PMC6180116; doi:10.1038/s41598-018-33150-2), 2018-10-10
Supplement: 41598_2018_33150_MOESM1_ESM.pdf [file 41598_2018_33150_MOESM1_ESM.pdf]

# **Glucocorticoids Induce Stress Oncoproteins Associated with Therapy-Resistance in African American and European American Prostate Cancer Cells**

<sup>1</sup>Leanne Woods-Burnham, <sup>1</sup>Christina K. Cajigas-Du Ross, <sup>1</sup>Arthur Love, <sup>1</sup>Anamika Basu, <sup>1</sup>Evelyn S. Sanchez-Hernandez, <sup>1</sup>Shannalee R. Martinez, <sup>1</sup>Greisha L. Ortiz-Hernández, <sup>2</sup>Laura Stiel, <sup>1</sup>Alfonso M. Durán, <sup>3</sup>Colwick Wilson, <sup>2</sup>Susanne Montgomery, <sup>4</sup>Sourav Roy, and <sup>1,5</sup>Carlos A. Casiano

<sup>1</sup>Center for Health Disparities and Molecular Medicine and Department of Basic Sciences, Loma Linda University School of Medicine, Loma Linda, CA, USA; <sup>2</sup>Loma Linda University School of Behavioral Health, Loma Linda, CA, USA; <sup>3</sup>Oakwood University, Huntsville, AL, USA; <sup>4</sup>Department of Entomology and Institute for Integrative Genome Biology, University of California Riverside, Riverside, CA, USA; <sup>5</sup>Department of Medicine, Loma Linda University School of Medicine, Loma Linda, CA, USA.

Author for correspondence: Carlos A. Casiano, Ph.D., Center for Health Disparities and Molecular Medicine, Mortensen Hall 142, 11085 Campus St., Loma Linda University School of Medicine, Loma Linda, CA 92350, USA; Tel: 1-909-558-1000 ext. 42759; Fax: 1-909-558-0196; Email: [ccasiano@llu.edu](mailto:ccasiano@llu.edu)

## Supplementary Figure S1

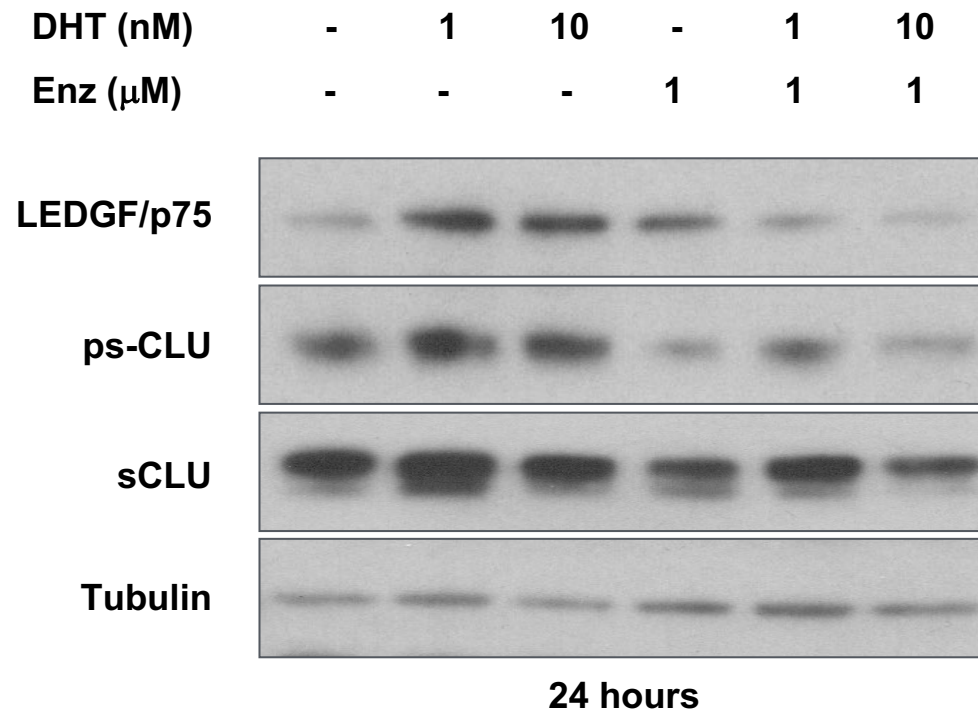

**Supplementary Figure S1. Androgen-induced upregulation of LEDGF/p75 and CLU in 22Rv1 cells. Cells were treated for 24 hours with DHT or Enz. Untreated (U) cells were used as controls. Whole cell lysates were prepared for Western blotting and probed with anti-LEDGF/p75 and anti-sCLU antibodies. Results from two independent experiments were quantified with ImageJ. Results reveal a trend of increased LEDGF/p75 and CLU expression in 22Rv1 cells treated with DHT. Enz attenuated LEDGF/p75 and CLU expression. This image is uncropped and all bands are derived from the same gel.**

## Uncropped Gel Images

Full Scan for Fig 1A-Dexamethasone

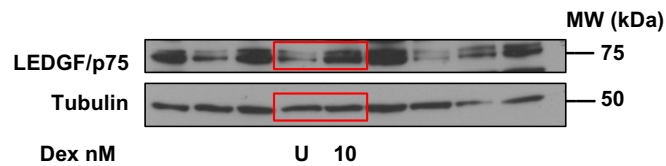

Full Scan for Fig 1B-Dexamethasone

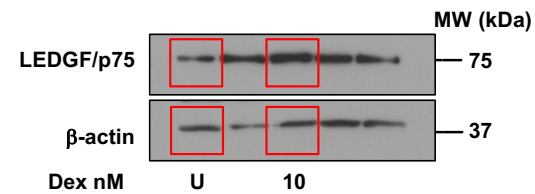

Full Scan for Fig 1A-Cortisol

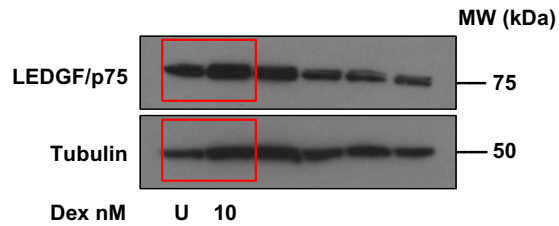

Full Scan for Fig 1B-Cortisol

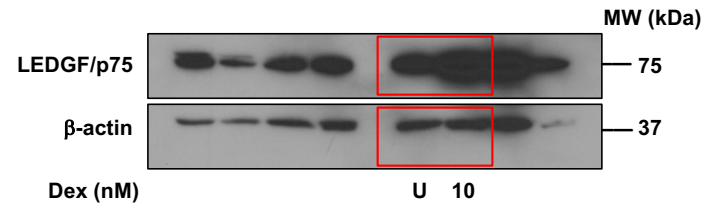

Supplementary Figure S2. Complete representation of full-length blots/gels. All western blot images shown in this manuscript are provided in full-length without cropping.

## Supplementary Figure S2 (cont.)

### Full Scan for Fig 1C-Dexamethasone

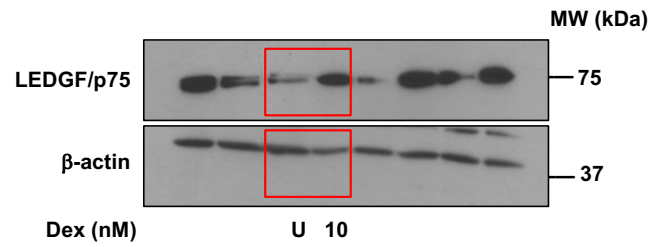

### Full Scan for Fig 1D-Dexamethasone

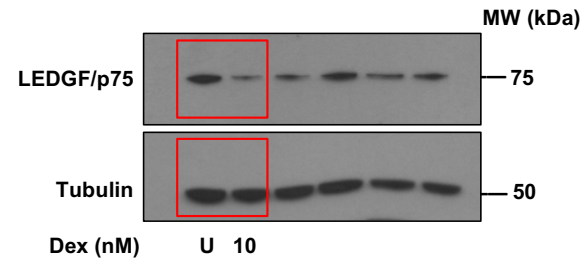

### Full Scan for Fig 1C-Cortisol

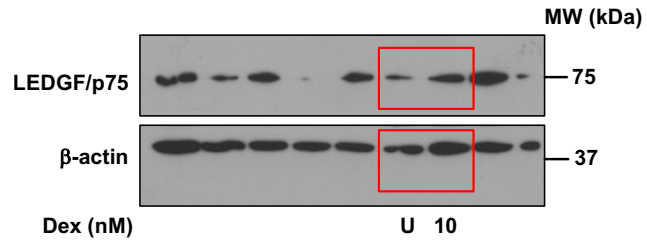

### Full Scan for Fig 1D-Cortisol

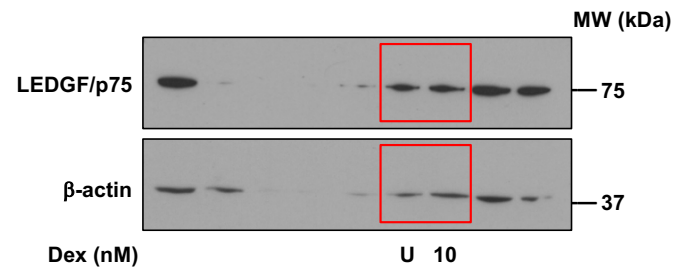

## Supplementary Figure S2 (cont.)

### Full Scan for Fig 2A

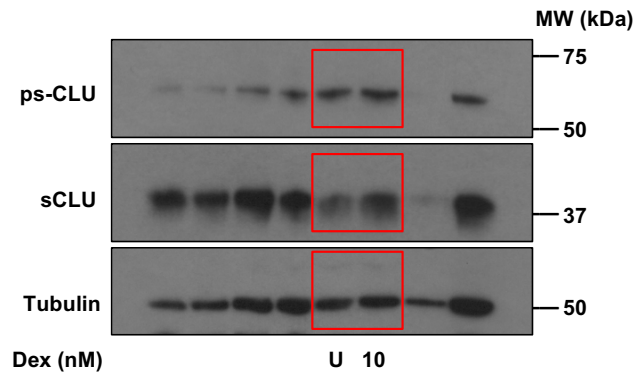

### Full Scan for Fig 2B

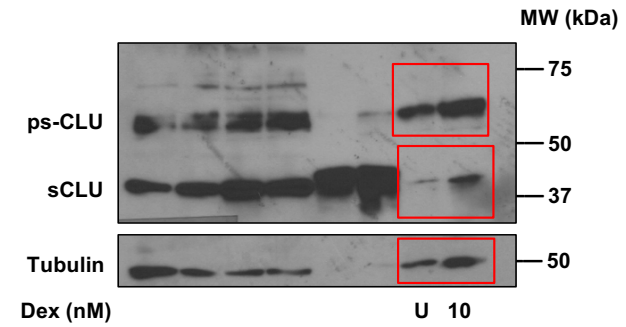

### Full Scan for Fig 2C

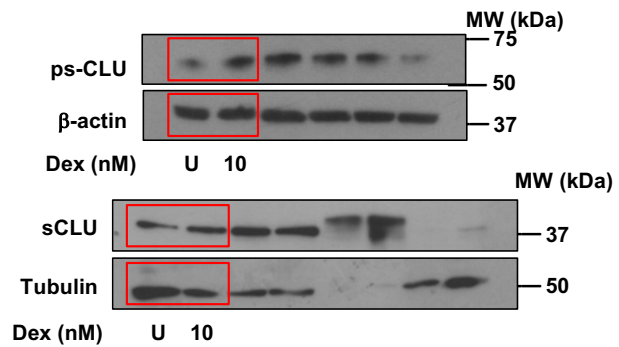

### Full Scan for Fig 2D

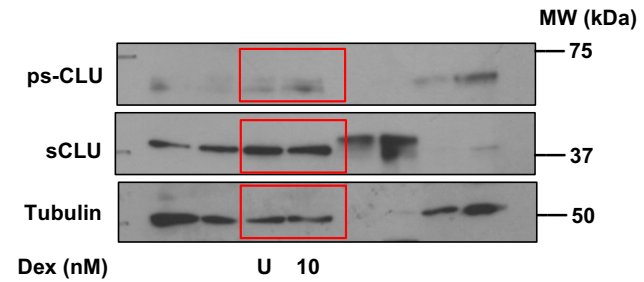

Supplementary Figure S2 (cont.)

Full Scan for Fig 4A

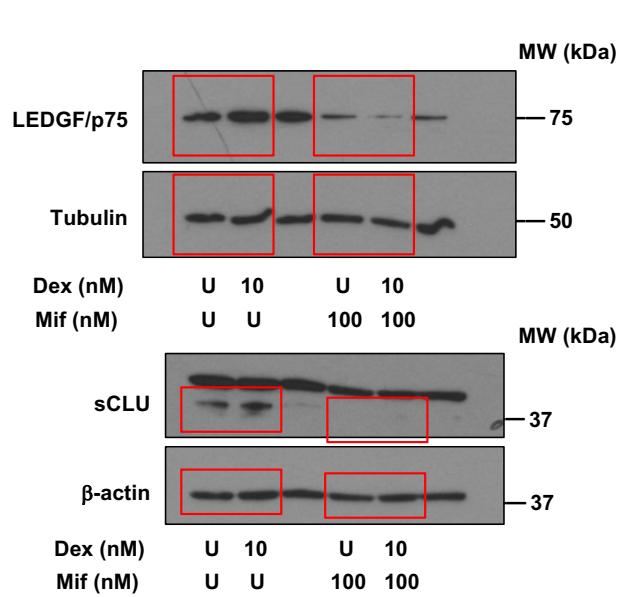

Full Scan for Fig 4B

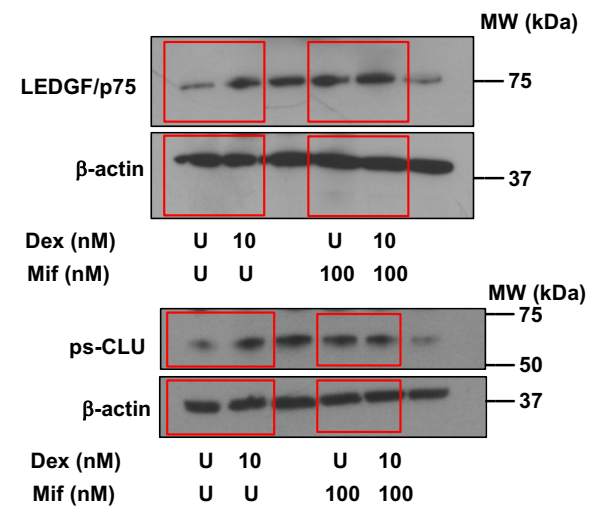

Supplementary Figure S2 (cont.)

Full Scan for Fig 5A

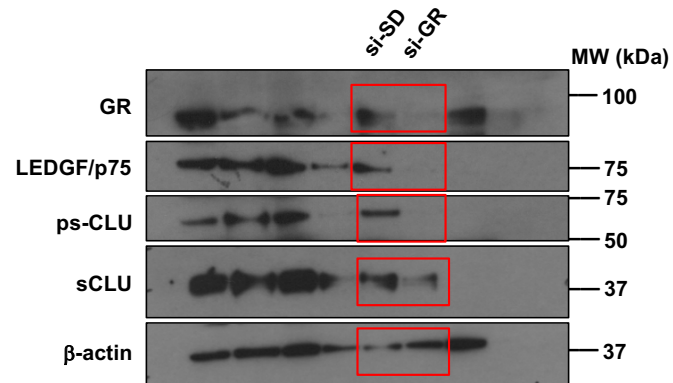

Full Scan for Fig 5B

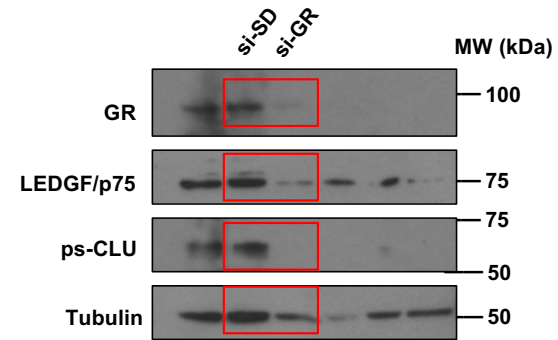

Supplementary Figure S3

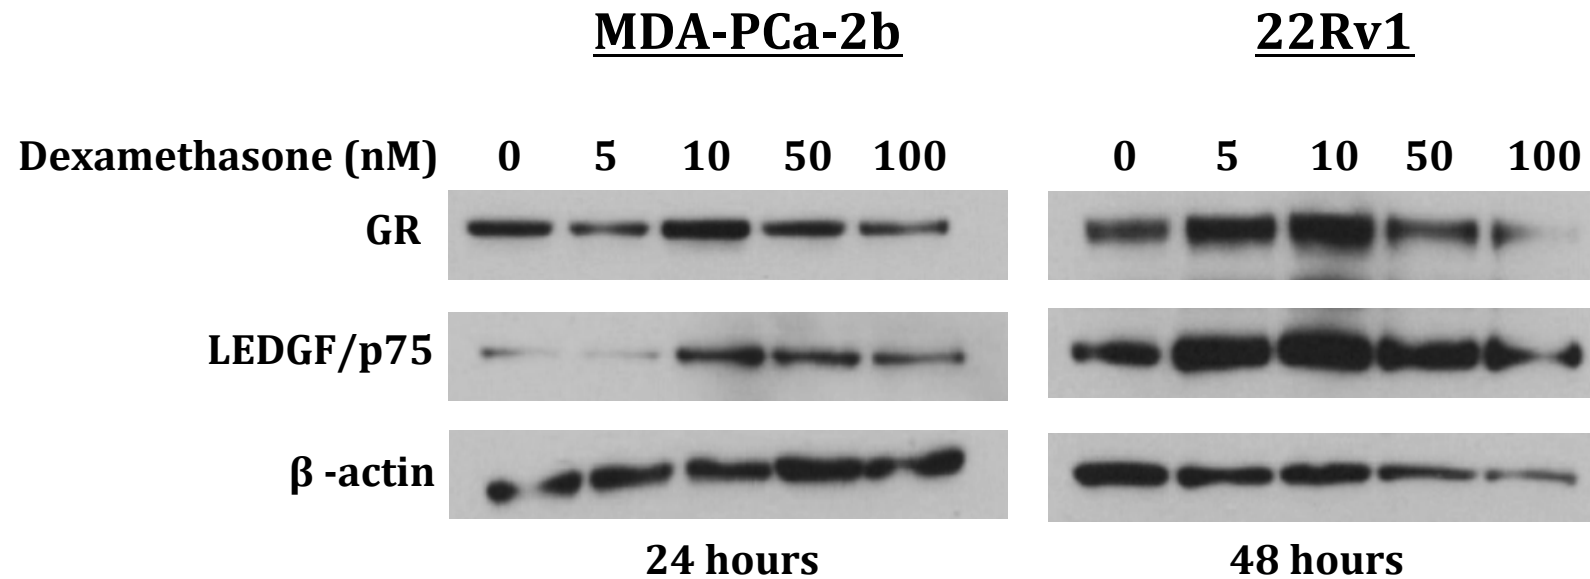

Supplementary Figure S3. Dose-dependent treatment of MDA-PCa-2b and 22Rv1 cells with Dex. Cells were initially treated in a dose-dependent manner with Dex. Whole cell lysates were prepared for Western blotting and probed with anti-GR and anti-LEDGF/p75 antibodies. Results revealed the most robust upregulation of GR and LEDGF/p75 protein expression in MDA-PCa-2b and 22Rv1 cells treated with 10 nM Dex. This image is uncropped and all bands are derived from the same gel.



**Supplementary Table S1**

| <b>Gene</b> | <b>Site</b>                       | <b>Size (bp)</b> | <b>Source</b>                         |
|-------------|-----------------------------------|------------------|---------------------------------------|
| GilZ        | AGAACAttgGGTTCC                   | 15               | (Sebastiaan H. Meijnsing et al. 2009) |
| GilZ        | GGAACCCAATGTTCT                   | 15               | (Jen-Chywan Wang et al. 2004)         |
| GilZ        | TTAACAGAATGTCCT                   | 15               | (Jen-Chywan Wang et al. 2004)         |
| GilZ        | CAAACACCGTGTTCA                   | 15               | (Jen-Chywan Wang et al. 2004)         |
| GilZ        | CCTGCACCTTTGTTCT                  | 16               | (Jen-Chywan Wang et al. 2004)         |
| Pal         | AGAACAaaaTGTTCT                   | 15               | (Sebastiaan H. Meijnsing et al. 2009) |
| Sgk         | AGAACAttTGTCCG                    | 15               | (Sebastiaan H. Meijnsing et al. 2009) |
| Tat         | AGAACAtcccTGTA CA                 | 16               | (Sebastiaan H. Meijnsing et al. 2009) |
| Cgt         | AGAACAttTGTACG                    | 15               | (Sebastiaan H. Meijnsing et al. 2009) |
| Cons        | AGAACAaaaTGTA CC                  | 15               | (Sebastiaan H. Meijnsing et al. 2009) |
| FKBP5       | AGAACAaggTGTTCT                   | 15               | (Sebastiaan H. Meijnsing et al. 2009) |
| hKLF15GRE1  | caattacatgtgttctg                 | 19               | (Maki Asada et al. 2011)              |
| hKLF15GRE2  | ccggaacagcgtgtcccct               | 19               | (Maki Asada et al. 2011)              |
| hGRE 6.4    | AGAACATTTTGTCCG                   | 15               | (Alex Yick-Lun So et al. 2007)        |
| hGRE 12.1   | AGAACAGAATGTCCT                   | 15               | (Alex Yick-Lun So et al. 2007)        |
| hGRE 16.1#1 | AGGACAGCCTGTCCT                   | 15               | (Alex Yick-Lun So et al. 2007)        |
| hGRE 16.1#2 | AGAACAGGATGTTTA                   | 15               | (Alex Yick-Lun So et al. 2007)        |
| hGRE 19.2   | GGAACACGGCGTCCC                   | 15               | (Alex Yick-Lun So et al. 2007)        |
| hGRE 5.1    | GGTACATTCTGTTCA                   | 15               | (Alex Yick-Lun So et al. 2007)        |
| hGRE 6.1#1  | AGAACAGGGTGTTCT                   | 15               | (Alex Yick-Lun So et al. 2007)        |
| hGRE 6.1#2  | AGCACATCGAGTTCA                   | 15               | (Alex Yick-Lun So et al. 2007)        |
| hGRE 6.2    | GGTACAGTTTGT TAC                  | 15               | (Alex Yick-Lun So et al. 2007)        |
| hGRE 10.3   | GGAACAGAAAGTATT                   | 15               | (Alex Yick-Lun So et al. 2007)        |
| hGRE 10.4   | GGTACAGACCGTTCT                   | 15               | (Alex Yick-Lun So et al. 2007)        |
| hGRE 10.5   | AGAACACAATGTTCT                   | 15               | (Alex Yick-Lun So et al. 2007)        |
| hGRE X.1    | AGCACACCCGGAGCA                   | 15               | (Alex Yick-Lun So et al. 2007)        |
| hGRE X.2    | AGAACATTGGGTTCC                   | 15               | (Alex Yick-Lun So et al. 2007)        |
| CYP2C9      | aacTGA ACTgaaTGTTTTgct            | 21               | (Ferguson SS et al. 2005)             |
| CYP2C9      | cccaacTGA ACTgaaTGTTTgcttga       | 26               | (Yuping Chen et al. 2003)             |
| CYP2C8      | ggtTTAACTggaTGTTTTgct             | 21               | (Ferguson SS et al. 2005)             |
| CYP2C19     | ctcaatTGA ACTgaaTGTTTTgcttga      | 27               | (Yuping Chen et al. 2003)             |
| GM550       | GATCTCTTATTATGACTCTTGCTTTCCTCTTCC | 35               | (Smith PJ et al. 2001)                |

### Supplementary Table S1 (cont.)

|                |                          |    |                               |
|----------------|--------------------------|----|-------------------------------|
| A1AR           | CAGAACAGTC               | 10 | (Ren H and Stiles GL. 1999)   |
| osteocalcin    | agagGGTATAAACAGTGCTggagg | 24 | (Meyer T et al. 1997)         |
| hElastinGRE1   | GTGGCTTCCATGCTGTTCCCTGA  | 23 | (Monaco MD et al. 1997)       |
| hElastinGRE2   | CACGACCCTCCCCTGTTCCATCC  | 23 | (Monaco MD et al. 1997)       |
| hElastinGRE3   | CTCCCACCTCCCTGTTCCCCAC   | 23 | (Monaco MD et al. 1997)       |
| hElastinGRE4   | TATCAGGAACAGAGTGTCTGGCG  | 24 | (Monaco MD et al. 1997)       |
| pGRE           | AGAACATGATGTTCT          | 15 | (Lundback T and Hard T. 1996) |
| pGR2           | AGGACATGATGTCCT          | 15 | (Lundback T and Hard T. 1996) |
| pHPV           | GCTACATCCTGTTTT          | 15 | Mittal R et al. 1993)         |
| pHPV           | GGCACAAAATGTGTT          | 15 | Mittal R et al. 1993)         |
| pHPV           | TGTACATTGTGTCAT          | 15 | Mittal R et al. 1993)         |
| HPV Palindrome | AGAACANNNTGTTCT          | 15 | Chan WK et al. 1989)          |
| HPV Consensus  | GGTACANNNTGTTCT          | 15 | Chan WK et al. 1989)          |
| HIV            | GAGAACA                  | 7  | (Ghosh D. 1992)               |
| hGH            | GCGACAATGTGTCCT          | 16 | (Slater EP et al. 1985)       |
| hMTIIA         | CGGTACACTGTGTCCT         | 16 | (Slater EP et al. 1985)       |
| MMTV           | GGTTACAAACTGTTCT         | 16 | (Slater EP et al. 1985)       |

## Supplementary Table S2

MOTIF 1 RGWACABNNTGTYCH

letter-probability matrix: alength= 4 w= 15 nsites= 30 E= 0e+0

|          |          |          |          |
|----------|----------|----------|----------|
| 0.600000 | 0.033333 | 0.300000 | 0.066667 |
| 0.033333 | 0.033333 | 0.900000 | 0.033333 |
| 0.633333 | 0.100000 | 0.066667 | 0.200000 |
| 1.000000 | 0.000000 | 0.000000 | 0.000000 |
| 0.000000 | 1.000000 | 0.000000 | 0.000000 |
| 0.966667 | 0.033333 | 0.000000 | 0.000000 |
| 0.116667 | 0.183333 | 0.316667 | 0.383333 |
| 0.316667 | 0.183333 | 0.216667 | 0.283333 |
| 0.383333 | 0.183333 | 0.283333 | 0.150000 |
| 0.066667 | 0.066667 | 0.100000 | 0.766667 |
| 0.000000 | 0.000000 | 1.000000 | 0.000000 |
| 0.033333 | 0.000000 | 0.000000 | 0.966667 |
| 0.100000 | 0.266667 | 0.066667 | 0.566667 |
| 0.066667 | 0.800000 | 0.000000 | 0.133333 |
| 0.166667 | 0.166667 | 0.100000 | 0.566667 |

**Supplementary Table S3**

| <b>Gene</b> | <b>Putative Sites</b> | <b>Size (bp)</b> | <b>Start Position</b> | <b>End position</b> | <b>Strand</b> | <b>Detected by</b> |
|-------------|-----------------------|------------------|-----------------------|---------------------|---------------|--------------------|
| Clusterin   | AGCACAGGAAGTATT       | 15               | 132                   | 146                 | -             | FIMO               |
| Clusterin   | AACACAATTCTGTTTC      | 16               | 51                    | 66                  | +             | In-house script    |
| Clusterin   | TGTTTC                | 6                | 109                   | 115                 | +             | In-house script    |
| Clusterin   | AGATTGTGTCTT          | 12               | 276                   | 287                 | +             | In-house script    |
| Clusterin   | ACAGGGTGCCGC          | 12               | 638                   | 650                 | +             | In-house script    |
| LEDGF/p75   | GAAACCCTACGTCCC       | 15               | 611                   | 625                 | -             | FIMO               |
| LEDGF/p75   | TGTTTT                | 6                | 28                    | 33                  | +             | In-house script    |
| LEDGF/p75   | AGAACATGAATCTTT       | 15               | 315                   | 329                 | +             | In-house script    |
